# Supplementary material for: Assessment of Myocardial Fibrosis in Mice Using a T2*-Weighted 3D Radial Magnetic Resonance Imaging Sequence
Source: PubMed Central journal article supplement (PMC4482648; doi:10.1371/journal.pone.0129899), 2015-06-26
Supplement: pone.0129899.s004.pdf [file pone.0129899.s004.pdf]

**Supplemental information to:**  
**Assessment of myocardial fibrosis in mice using a T2\*-weighted 3D**  
**radial magnetic resonance imaging sequence**

Bastiaan J. van Nierop, Noortje A.M. Bax, Jules L. Nelissen, Fatih Arslan, Abdallah G. Motaal,  
Larry de Graaf, Jaco J.M. Zwanenburg, Peter R. Luijten, Klaas Nicolay, Gustav J. Strijkers

**Supplemental Figure 4: Prussian blue staining.**

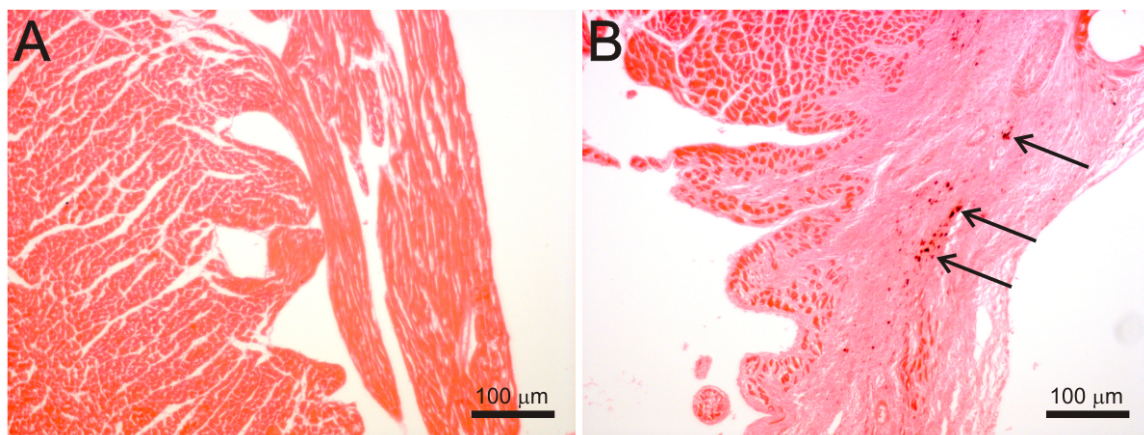

Representative Prussian Blue stained slices of (A) a control heart and (B) the infarct area of a post-MI heart. Hardly any iron deposits were present in the healthy hearts and only very small amounts were found in the infarct area (%).
