# Supplementary material for: Assessment of Myocardial Fibrosis in Mice Using a T2*-Weighted 3D Radial Magnetic Resonance Imaging Sequence
Source: PubMed Central journal article supplement (PMC4482648; doi:10.1371/journal.pone.0129899), 2015-06-26
Supplement: pone.0129899.s006.pdf [file pone.0129899.s006.pdf]

**Supplemental information to:**  
**Assessment of myocardial fibrosis in mice using a T2\*-weighted 3D  
radial magnetic resonance imaging sequence**

Bastiaan J. van Nierop, Noortje A.M. Bax, Jules L. Nelissen, Fatih Arslan, Abdallah G. Motaal,  
Larry de Graaf, Jaco J.M. Zwanenburg, Peter R. Luijten, Klaas Nicolay, Gustav J. Strijkers

**Supplemental Table 1:** General animal characteristics and global LV cardiac parameters determined from cine MRI of the cohort of control mice, post-MI mice and TAC mice.

|                            | Control |       | MI   |        | TAC  |        |
|----------------------------|---------|-------|------|--------|------|--------|
| n                          | 10      |       | 18   |        | 12   |        |
| HW [mg]                    | 156     | ± 17  | 181  | ± 29*  | 252  | ± 72‡  |
| HW/TL [mg/mm]              | 8.7     | ± 0.6 | 10.1 | ± 1.6* | 13.9 | ± 4.0‡ |
| LV mass [mg]               | 85      | ± 9   | 109  | ± 22‡  | 135  | ± 33‡  |
| LV mass/TL [mg/mm]         | 4.7     | ± 0.5 | 6.3  | ± 1.1‡ | 7.6  | ± 2.0‡ |
| LuW [mg]                   | 179     | ± 35  | 157  | ± 23   | 213  | ± 75   |
| LuW/TL [mg/mm]             | 10.4    | ± 2.1 | 8.8  | ± 1.2  | 11.7 | ± 4.2  |
| HR [min <sup>-1</sup> ]    | 509     | ± 33  | 519  | ± 42   | 518  | ± 46   |
| Resp [min <sup>-1</sup> ]  | 81      | ± 12  | 79   | ± 10   | 83   | ± 9    |
| EF [%]                     | 61      | ± 7   | 33   | ± 14‡  | 42   | ± 18‡  |
| EDV [μl]                   | 68      | ± 11  | 125  | ± 47‡  | 108  | ± 38‡  |
| ESV [μl]                   | 27      | ± 7   | 89   | ± 48‡  | 68   | ± 42‡  |
| SV [μl]                    | 41      | ± 7   | 36   | ± 10   | 40   | ± 10   |
| CO [ml min <sup>-1</sup> ] | 22      | ± 3   | 19   | ± 6*   | 21   | ± 5    |

Listed parameters are: n = number of mice, HW = heart weight, HW/TL = heart weight normalized to tibia length, LV mass = left ventricular myocardial mass as determined using MRI, LV mass/TL is LV mass normalized to tibia length, LuW = lung weight, LuW/TL = lung weight normalized to tibia length, HR = heart rate, Resp = respiratory rate, EF = ejection fraction, EDV = end diastolic volume, ESV = end systolic volume, SV = stroke volume, CO = cardiac output. Statistical differences are indicated by \* ( $P < 0.05$ ), † ( $P < 0.01$ ) and ‡ ( $P < 0.001$ ).
