# Supplementary material for: Assessment of Myocardial Fibrosis in Mice Using a T2*-Weighted 3D Radial Magnetic Resonance Imaging Sequence
Source: PLOS journal article supplement (doi:10.1371/journal.pone.0129899), 2015-06-26
Supplement: S1 (10.1371/journal.pone.0129899.s001) [file journal.pone.0129899.s001]

**Supplemental information to:**  
**Assessment of myocardial fibrosis in mice using a T2\*-weighted 3D**  
**radial magnetic resonance imaging sequence**

Bastiaan J. van Nierop, Noortje A.M. Bax, Jules L. Nelissen, Fatih Arslan, Abdallah G. Motaal,  
Larry de Graaf, Jaco J.M. Zwanenburg, Peter R. Luijten, Klaas Nicolay, Gustav J. Strijkers

**Supplemental Figure 1: Infarct size quantification from histology.**

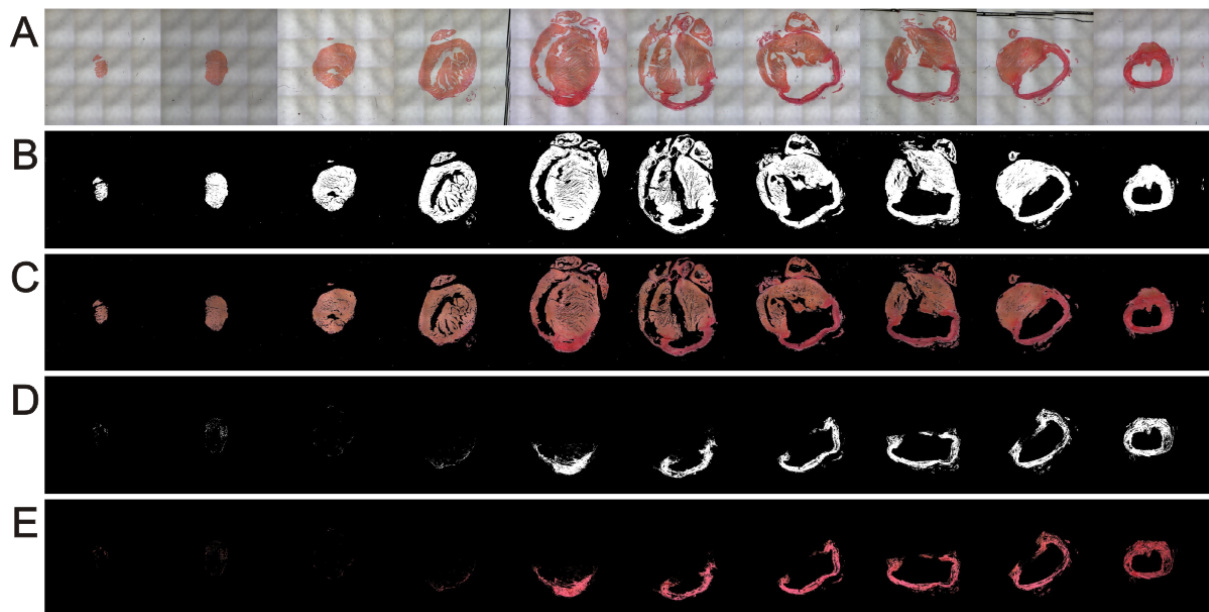

(A) Representative stack of ten Picrosirius stained slices of a post-MI heart. A custom-built color detection algorithm was used to define (B) a whole heart mask to remove the background from (C) the histological images. To this end, the original RGB images (red-green-blue) were converted to HSV images (hue-saturation-value) and signal intensity thresholds were applied to the different HSV channels. (D) Next, a mask was defined to select (E) the collagen rich area, using a signal intensity threshold on the hue channel. The HSV thresholds were determined empirically and proper selection of the heart and collagen rich area were confirmed by visual inspection.
